1 **Predicting targets and costs for feral-cat reduction on large islands using**  
2 **stochastic population models**

3

4 Kathryn R. W. Venning<sup>1,\*</sup>, Frédéric Saltré<sup>1</sup>, Corey J. A. Bradshaw<sup>1</sup>

5

6 <sup>1</sup>Global Ecology, College of Science and Engineering, GPO Box 2100, Flinders University,  
7 Adelaide, South Australia 5001, Australia

8

9 \*Corresponding author: Global Ecology, College of Science and Engineering, Flinders  
10 University, GPO Box 2100, Adelaide, South Australia 5001, Australia; tel: +61 8 8201 2090;  
11 e-mail: [kathryn.venning@flinders.edu.au](mailto:kathryn.venning@flinders.edu.au)

12

13 **Acknowledgments**

14 The authors acknowledge the traditional owners of the land we work on, and pay our respects  
15 to Elders, past, present and emerging. We thank the Kangaroo Island section of the South  
16 Australia Department of Environment and Water for data access and insights.

17

18 **Acknowledgments**

19 The R code described in this manuscript is available at  
20 <https://github.com/KathrynVenning/FeralCatEradication>

21

22 **Declaration of interest**

23 NIL

## 24 **Predicting targets and costs for feral-cat reduction on large islands using** 25 **stochastic population models**

26

### 27 **Abstract**

28 Feral cats are some of the most destructive invasive predators worldwide, particularly in  
29 insular environments; hence, density-reduction campaigns are often applied to alleviate the  
30 predation mortality they add to native fauna. Density-reduction and eradication efforts are  
31 costly procedures with important outcomes for native fauna recovery, so they require  
32 adequate planning to be successful. These plans need to include empirical density-reduction  
33 models that can guide yearly culling quotas, and resource roll-out for the duration of the  
34 culling period. This ensures densities are reduced over the long term and that no resources are  
35 wasted. We constructed a stochastic population model with cost estimates to test the relative  
36 effectiveness and cost-efficiency of two main culling scenarios for a 10-year eradication  
37 campaign of cats on Kangaroo Island, Australia: (1) constant proportional annual cull (one-  
38 phase), and (2) high initial culling followed by a constant proportional maintenance cull  
39 (two-phase). A one-phase cull of at least 0.35 of the annual population size would reduce the  
40 final population to 0.1 of its original size, while a two-phase cull with an initial cull of  
41 minimum 0.6 and minimum 0.5 maintenance cull would reduce the final population to 0.01  
42 of its initial size by 2030. Cost estimates varied widely depending on the methods applied  
43 (shooting, trapping, aerial poison baits, *Felixer*<sup>TM</sup> poison-delivery system), but using baiting,  
44 trapping and *Felixers* with additional shooting to meet culling quotas was the most cost-  
45 effective combination (minimum cost: AU\$19.56 million; range: AU\$16.87 million–  
46 AU\$20.69 million). Our model provides an adaptable and general assessment tool for cat  
47 reductions in Australia and potentially elsewhere, and provides relative culling costs for the  
48 Kangaroo Island programme specifically.

49

50

51

## Main text

### Introduction

52 Since its domestication approximately 10,000 years ago, the common house cat *Felis*  
53 *silvestris catus* has spread throughout the globe and become established in most habitat types  
54 (including on most islands) (Fitzgerald et al. 1991; Medina et al. 2011; Woinarski et al.  
55 2015), due to both accidental and deliberate human facilitation (Driscoll et al. 2007). Because  
56 they are generalist predators, feral cats are today one of the most destructive invasive  
57 mammal predators worldwide (Lowe et al. 2000; Doherty et al. 2016a), contributing to many  
58 of the predation-induced terrestrial (mainly island) extinctions recorded globally (e.g., > 63  
59 species, including 26% of bird, mammal and reptile extinctions) (Doherty et al. 2016b).

60 The most effective method for removing the predation mortality on native species caused  
61 by feral cats is eradication wherever possible (Andersen et al. 2004; Schmidt et al. 2009),  
62 particularly in insular environments (Bester et al. 2002; Nogales et al. 2004; Doherty et al.  
63 2016a). Alternative non-lethal approaches (such as trap-neuter-release) also exist (Gibson et  
64 al. 2002; Wallace & Levy 2006; Longcore et al. 2009; Miller et al. 2014), and while such an  
65 approach might appeal to members of the public that do not agree with lethal control  
66 (Andersen et al. 2004), the high expense of broad-scale implementation, coupled with its  
67 relatively low effectiveness compared to lethal methods (Longcore et al. 2009; Campbell et  
68 al. 2011) mean it is not widely used for cat management in Australia. Despite this, the trap-  
69 neuter-release management option is commonly considered in density-control programs, or  
70 proposed by communities (Deak et al. 2019).

71 Lethal control methods include poison baiting, trapping, and hunting (Campbell et al.  
72 2011; DIISE 2018). *Eradicat*<sup>®</sup> and *Curiosity*<sup>®</sup> are poison baits developed specifically to  
73 target cats in Australia (Algar et al. 2011). *Curiosity*<sup>®</sup> contains a robust, acid-soluble polymer  
74 pellet of para-aminopropiophenone poison (as opposed to 1080 poison, commonly used in  
75 dog and fox baits) (Department of Primary Industries and Regions 2020; Sharp & Quinn  
76 2020), and is the only bait approved for feral cat control in South Australia (Department of  
77 Primary Industries and Regions 2020). Additionally, new technology is emerging in the field  
78 of feral cat baiting — particularly in terms of bait delivery — such as the *Felixer*<sup>™</sup>. The  
79 *Felixer*<sup>™</sup> is an automated toxin-delivery system that uses rangefinder sensors to distinguish  
80 target cats from non-target species and sprays targets with a measured dose of toxic gel  
81 (thylation.com). Two types of trapping are often used simultaneously and in combination  
82 with baiting: cages and padded leg-hold traps. Animals are live-caught in traps and humanely

83 dispatched, primarily with a 0.22-calibre rifle (Algar et al. 2020). Hunting is a term used for  
84 locating and shooting feral cats either during the day or at night (with the aid of a spotlight)  
85 from a slow-moving vehicle or on foot with a 0.22-calibre rifle (Nogales et al. 2004; Sharp  
86 2018). Because shooting is the tool used for control, we refer to this technique as ‘shooting’  
87 hereafter.

88 Most density-reduction campaigns based on direct killing have been typically  
89 implemented *ad hoc* because of the ongoing predation by cats on native prey species, and the  
90 requirement to achieve outcomes quickly (Bester et al. 2002; Denny & Dickman 2010). As  
91 such, available funds or resources can be used up quickly without the benefit of long-term  
92 planning based on the projections of empirical density-reduction models (Denny & Dickman  
93 2010), thus threatening the success of a program. As a result, inappropriate methods and  
94 poorly timed roll-out have been attributed to most island eradication failures (Campbell et al.  
95 2011). Custom-designed culling models that plan the most efficient and cost-effective  
96 application of resources are therefore ideal precursors to any eradication program (Smith et  
97 al. 2005; McMahon et al. 2010).

98 Culling models can be effective in this manner because of their ability to consider real-  
99 time population dynamics and resource availability to recommend feasible density-reduction  
100 plans (McMahon et al. 2010). Multiple types of culling model exist (e.g., spatially explicit,  
101 aspatial, density-driven, area-dependent) depending on the choice of scenario to reduce the  
102 population, such as a single-phase, constant proportional culling (McCarthy et al. 2013), or a  
103 two-phase cull with a high initial proportional culling rate followed by a constant  
104 proportional maintenance thereafter (i.e., a two-phase reduction model) (Campbell et al.  
105 2011). Such models are instrumental in guiding successful eradication by providing targets  
106 and parameters that lead to efficient population reduction of the target species (Smith et al.  
107 2005). Such two-phase eradication strategies (high initial cull followed by a consistent  
108 maintenance cull to ensure continued population decline) often still require a final ‘clean up’  
109 stage where different (and usually more expensive) strategies are needed to eradicate the last  
110 surviving individuals that are difficult to detect (Bester et al. 2002; Nogales et al. 2004), and  
111 a ‘monitoring for success’ phase to ensure all animals have been removed (Algar et al. 2020).  
112 High initial culls followed by maintenance culling capitalise on the notion that when densities  
113 are high, culling is more efficient, while the maintenance culling continues to reduce the  
114 population as densities decline (Nogales et al. 2004; Denny & Dickman 2010).

115 Cat removal with the goal to eradicate is currently underway on part of Kangaroo Island,  
116 Australia’s third-largest island. The initial planning stages of the eradication began in 2016,

117 with a proposed completion date of 2030. Kangaroo Island is a good candidate for eradication  
118 because of the island's relatively intact native biodiversity compared to the mainland, and  
119 high local endemism (Taggart et al. 2019), as well as local community support for removing  
120 feral cats (Berris et al. 2019). Kangaroo Island's feral cat eradication is part of the *Threat*  
121 *Abatement Plan*, that aims to "... prevent feral cats from occupying new areas in Australia  
122 and eradicate feral cats from high-conservation-value islands" (Environment 2015).

123 The program directors plan to use four main techniques for cat eradication on Kangaroo  
124 Island: baiting, trapping, shooting, and *Felixer*<sup>TM</sup> units. The social licence to apply lethal  
125 population reduction via shooting, baiting, or trapping is largely a function of the public's  
126 perception of the proposed methods (Deak et al. 2019), and relies on the co-operation of land  
127 owners. This applies to Kangaroo Island given it has more than 4200 permanent residents  
128 spread across most of the island. Perception surveys done between 1993 and 2018 showed  
129 that > 90% of the Kangaroo Island community supported domestic and feral cat management  
130 (Berris et al. 2019).

131 Our aim was to design an ideal set of culling conditions that will most efficiently reduce  
132 feral cat densities on Kangaroo Island. More specifically, we (1) constructed stochastic  
133 variants of both culling and fertility-reduction (trap-neuter-release) models under different  
134 application scenarios that can be applied to guide cat eradication on Kangaroo Island, (2)  
135 estimate the relative costs of employing different combinations of the methods available, and  
136 (3) use the culling model to identify a regime that will most effectively reduce the feral cat  
137 population by the 2030 deadline. Specifically, we tested the efficacy (proportion of the  
138 population reduced, and over what time) of two culling scenarios: (i) constant proportional  
139 annual culling (one-phase), (ii) high initial culling followed by a constant maintenance cull  
140 (two-phase). We hypothesise that the two-phase culling model will reach the target  
141 population density by 2030 more efficiently than the one-phase culling model because initial  
142 effort tends to be the cheapest and most effective means of achieving high rates of reduction  
143 (Bester et al. 2002; Nogales et al. 2004; Robertson 2008; Denny & Dickman 2010). In any  
144 case, maintenance culling is required thereafter to prevent the population from recovering.

145

## Methods

146 *Study site*

147 Located approximately 12 km south of the Fleurieu Peninsula (South Australia) at its nearest  
148 point, Kangaroo Island is Australia's third largest island (155 km long and 55 km wide),

149 covering ~ 440000 ha (Masters et al. 2004; Higgins-Desbiolles 2011) (Fig. 1). The island has  
150 retained around 53% of its native vegetation, with 35% of the remaining land cover devoted  
151 to dryland agriculture (Willoughby et al. 2018). The island is absent of invasive red foxes  
152 (*Vulpes vulpes*) and European rabbits (*Oryctolagus cuniculus*). As a consequence of the  
153 absence of rabbits, resident cats feed on a wider range of native species than elsewhere on  
154 mainland Australia (Bonnaud et al. 2011).

155 Feral cat densities on Kangaroo Island are thought to range from 0.06 to 3.27 cat km<sup>-2</sup>,  
156 with an average density of 0.37 cat km<sup>-2</sup>, giving an estimated population size of 1629 (s.e. ±  
157 661) individuals (Hohnen et al. 2020a; Hohnen et al. 2020b). Taggart et al. (2019) estimated  
158 that relative feral cat densities in eastern Kangaroo Island were ~ 10 times higher than on the  
159 adjacent mainland (Kangaroo Island relative abundance = 14.6 cats camera-trap-site<sup>-1</sup>;  
160 mainland = 1.39 cats site<sup>-1</sup>; 11 sites on both the Island and mainland).

161

## 162 *Model*

163 We constructed a Leslie matrix to represent age-specific fertility and survival (Caswell 2001)  
164 for the cat population on Kangaroo Island. We obtained cat fertility and survival estimates  
165 from six studies of domestic, stray and feral cat population across the USA and Australia  
166 (Budke & Slater 2009), and summarised the population dynamics from a study in Western  
167 Australia done in the preliminary stages of cat eradication (Short & Turner 2005). We  
168 calculated mean and standard deviations of the age-specific demographic rates (i.e., survival,  
169 fertility) necessary for stochastic representations of the model (see below). We only used  
170 these fertility and survival estimates for females, assuming a 1:1 sex ratio (Bloomer & Bester  
171 1991; Budke & Slater 2009).

172 According to demographic rates published in the peer-reviewed literature, the maximum  
173 age for feral cats ranges from 3 (Budke & Slater 2009) to 9 years (Van Aarde 1983). We set  
174 the maximum age to the median maximum age in the literature: 6 years; this was supported  
175 by feedback from wildlife managers on Kangaroo Island. Cats become sexually mature  
176 between 6 and 12 months of age (Jemmett & Evans 1977; Povey 1978; Jones & Coman  
177 1982; Bukowski & Aiello 2011). To account for pre-yearling reproductive output, we  
178 reduced the fertility in the initial year by one-third to represent the approximate proportion of  
179 juveniles breeding. For all resulting predictions of changing population size, we assumed that  
180 survival was the same for males and females given no evidence to the contrary. We present  
181 all parameters and their ranges in Table 1.

182 We stochastically resampled at each time step in the deterministic matrix  $\mathbf{A}$  in all  
 183 subsequent projections based on the standard deviation estimated from minimum and  
 184 maximum fertility and survival values (Budke & Slater 2009), which incorporates both  
 185 measurement error and inter-annual variability (process error). We assumed a Gaussian  
 186 distribution around the mean of fertility and the  $\beta$  distribution for survival probability, using  
 187 the standard deviations for resampling of each (Table 1).

188 The deterministic matrix  $\mathbf{A}$  is:

189

$$190 \quad \mathbf{A} = \begin{bmatrix} f_1 & f_2 & f_3 & f_4 & f_5 & f_6 & f_7 \\ s_1 & 0 & 0 & 0 & 0 & 0 & 0 \\ 0 & s_2 & 0 & 0 & 0 & 0 & 0 \\ 0 & 0 & s_3 & 0 & 0 & 0 & 0 \\ 0 & 0 & 0 & s_4 & 0 & 0 & 0 \\ 0 & 0 & 0 & 0 & s_5 & 0 & 0 \\ 0 & 0 & 0 & 0 & 0 & s_6 & s_7 \end{bmatrix}$$

191

192 where  $f_x$  = age ( $x$ ) -specific fertility and  $s_x$  = age-specific survival (note:  $f_1$  represents 0 years,  
 193 because individuals are  $< 1$  year old in their first year). See also Table 1 for parameter values.

194

#### 195 *Untreated (control) population*

196 To simulate how incrementing intensities of reduction alter the projected population size, we  
 197 first simulated a population not exposed to any culling to represent a ‘control’ population. We  
 198 calculated the population’s stable age distribution from the base matrix  $\mathbf{A}$  (Caswell 2001),  
 199 and then multiplied this stable age structure by a starting population size of 1629 (Hohnen et  
 200 al. 2020b). We then expressed all subsequent projections as a proportion of this founding  
 201 population size to avoid the uncertainty in initial population size estimates. Kangaroo Island  
 202 is insular, so there are fewer opportunities for migration into the population compared to the  
 203 mainland, and local residents are largely cooperative with the regulation of domestic cats to  
 204 assist in eradication ( $> 90\%$  community support; Berris et al. 2019). However, we did  
 205 account for some ‘leakage’ into the population (domestic release or ferry stow-away) by re-  
 206 running the top-performing culling scenario and adding an incrementing number of ‘leaked’  
 207 individuals (between 10 and 1000 cats) into the population annually to test how these  
 208 additions would affect final population sizes post-culling (see Supporting Information,  
 209 Appendix A, Fig. S1).

210 We included a logistic compensatory density-feedback function by reducing survival when  
 211 the population exceeded double the size of the current population (see below) of the form:



212 
$$S_{\text{mod}} = \frac{\kappa}{1 + \left(\frac{N}{\tau}\right)^\theta}$$

213 where  $S_{\text{mod}}$  is the proportion of realised survival (survival modifier) as a function of the  
214 population's proximity to carrying capacity (twice the founding population size,  $K = 3258$ ;  
215 see below),  $N$  is the population size, and  $\kappa$ ,  $\tau$  and  $\theta$  are constants:  $\kappa = 1.001$ ,  $\tau = 5459.994$ , and  
216  $\theta = 1.690$  (see Supporting Information, Appendix B, Fig. S2). We thus assumed that survival  
217 probability would decline as the population approached carrying capacity (double the size of  
218 the current population). The feedback mechanism means that as the population approaches  
219 carry capacity, survival across all ages is reduced by  $S_{\text{mod}}$  according to this relationship. This  
220 function acts to drive total population size away from carry capacity. We set carry capacity to  
221 twice the initial population because landscape managers currently consider the population to  
222 be below carry capacity with respect to available food resources (Jones & Coman 1982; Read  
223 & Bowen 2001). While the carrying capacity is somewhat arbitrary, it does realistically allow  
224 the population to increase if no additional mortality sources are imposed. Most research on  
225 feral cat population control does not consider the habitat's carrying capacity (Andersen et al.  
226 2004); however, feral cats seem to maintain consistent fertility regardless of population  
227 density, although average survival tends to decrease as the population approaches carrying  
228 capacity (Courchamp & Sugihara 1999; Nutter 2006). We therefore did not adjust fertility  
229 relative to population size.

230

## 231 *Reduction scenarios*

### 232 *1. Trap-neuter-release*

233 To compare the efficacy of our modelled density-control and -reduction scenarios with  
234 fertility-reduction methods, we constructed a model that simulated a trap-neuter-release  
235 implementation. Although not widely used, trap-neuter-release is often suggested by a certain  
236 element of the public as a more ethical alternative to lethal control. We included this scenario  
237 here to compare its efficacy directly to the culling scenarios described below. In this model,  
238 no animals are removed from the population, but fertility is reduced to simulate sterilisation.  
239 We ran this model using the same methods for an uncultured population (and over the same  
240 interval), but we reduced fertility for each iteration across a range of values (1–99%, at 1%  
241 intervals; e.g., fertility reduced by 50% in one scenario 51% in the next, and so forth). This  
242 represents the percentage of the population that is neutered (neutered individual fertility = 0),  
243 giving a realised population fertility of between 99% and 1% of non-intervention values



244 (depending on the pre-determined fertility-reduction target of the scenario). Each year, new  
245 individuals are neutered to maintain the predetermined population fertility.

246

## 247 2. *Culling model*

248 We built two culling models: (i) constant proportional annual culling (one-phase), and (ii) a  
249 high initial proportional cull in the first two years, followed by a constant proportional  
250 maintenance cull (two-phase). Here we consider only these phases of a strategy where the last  
251 step likely requires a ‘clean-up’ — the latter is difficult to consider in a model because the  
252 focus shifts to individuals. Additionally, we did not consider ‘monitoring for success’ as this  
253 stage does not involve culling *per se*. We instead defined a threshold at the end of the model,  
254 where moving to the ‘clean-up’ stage is deemed feasible. In each model, we removed  
255 individuals from the population vector proportional to the total culling invoked in that time  
256 step and the stable age distribution. We ran each model for 10,000 iterations (randomly  
257 sampling 10,000 times from the stochastic survival and fertility vectors) to calculate the mean  
258 and 95% confidence bounds for minimum proportional population size. We set the projection  
259 interval to 10 years to represent the management strategy for eradication by 2030 (2020–  
260 2030).

261 For the one-phase scenario, we simulated constant proportional annual culling ( $c$ ) (i.e., we  
262 reduced the population each year by the same proportion for the duration of the projection  
263 interval) from  $c = 0.20$  to  $0.90$ , at intervals of  $0.05$ . For the two-phase scenario, we applied  
264 high initial culling only in the first two years of the eradication project ( $c = 0.50$ – $0.99$ ), with  
265 maintenance culling applied to all years thereafter ( $c = 0.01$ – $0.50$ ) until the end of the  
266 projection interval. For all iterations of both models, we recorded the minimum projected  
267 proportional population size ( $pN$ ) for each value of  $c$ , at an incrementing proportional culling  
268 of  $0.01$ .

269

## 270 *Cost*

271 Based on previous information regarding the reduction in capture efficiency as population  
272 density declines (Bloomer & Bester 1992; Nogales et al. 2004; Parkes et al. 2014), we  
273 assumed an eradication technique’s efficiency ( $f$ , ranging from 0 to 1) follows a Type III  
274 functional response (i.e., sigmoidal; Nunney 1980, Denno and Lewis 2009) relative to  
275 proportional population size:

276

$$f = \frac{\alpha}{1 + (\beta e^{-\gamma pN})}$$

277 where  $f$  is the relative efficiency of the culling technique,  $\alpha$ ,  $\beta$  and  $\gamma$  are constants:  $\alpha = 1.01$ ,  $\beta$   
278  $= 85.61$ , and  $\gamma = 8.86$ , and  $pN$  = proportional population size (see Supporting Information,  
279 Appendix C, Fig. S3). We assumed the same efficiency reduction across trapping, shooting,  
280 baiting, and *Felixers*<sup>TM</sup> as a function of population size, such that the smaller the remaining  
281 population of cats, the less efficient each method was relative to the start of the eradication  
282 campaign. We then applied this reduction to the culling model with pre-set costs for each  
283 technique (see below), to estimate the total cost of eradication.

284 We sourced trapping and shooting cost data from Holmes et al. (2015), with additional  
285 trapping costs from trapping supplies (traps.com.au) and *Felixer*<sup>TM</sup> data from Moseby et al.  
286 (2020). We sourced aerial baiting data from Johnston et al. (2014) and Algar et al. (2020), as  
287 well via direct correspondence with the Australian federal Department of Agriculture, Water  
288 and the Environment (Julie Quinn, Canberra, Australian Capital Territory, pers. comm.) and  
289 Wrightsair (wrightsair.com.au; Ellodie Penprase, William Creek, South Australia, pers.  
290 comm.).

291 We summarised the catch rates and costs for each technique: (i) *Felixer*<sup>TM</sup> — each unit  
292 costs AU\$13,000. Based on efficacy trials at Arid Recovery, 20 *Felixer*<sup>TM</sup> units deployed  
293 over 2,600 ha were successful in killing 31 cats over 41 days, which translates to an annual  
294 kill rate of 5.749 (cats killed unit<sup>-1</sup> year<sup>-1</sup>). (ii) Traps — each trap costs between AU\$157 and  
295 AU\$297 (sampled uniformly). Based on trials on Dudley Peninsula, 40 traps deployed over  
296 approximately 12,000 ha caught 21 cats in 148 days, which translates to an annual trap rate of  
297 0.198 cats trap<sup>-1</sup> year<sup>-1</sup>. (iii) Shooting — from Holmes et al. (2015), we estimated a kill rate  
298 person-hour<sup>-1</sup> based on 1044 kills (872 direct + 172 from wounds) over 14,725 person-hours  
299 (= 0.071 cats killed person<sup>-1</sup> hour<sup>-1</sup>). Ammunition and labour costs equate to AU\$25.92  
300 hour<sup>-1</sup>. (iv) Baiting — each *Curiosity*<sup>®</sup> bait costs \$2.27 unit<sup>-1</sup>, with a one-off AU\$250  
301 administration fee order<sup>-1</sup> (treidlia.com.au; Arsalan Shah, Tréidlia Biovet Pty. Ltd., Seven  
302 Hills, New South Wales, pers. comm.). We received fixed-wing charter costs directly from  
303 Wrightsair that quoted AU\$750 hour<sup>-1</sup> when actively baiting and AU\$600 hour<sup>-1</sup> for  
304 chartering aircraft from their base in William Creek, South Australia. From Johnston et al.  
305 (2014) based on 15 collared cats, an average density 0.701 cats km<sup>-2</sup> (approximate total area:  
306 15 × 0.701 = 10.515 km<sup>2</sup>), with 50 baits km<sup>-2</sup> (526 baits), killed 14 cats (= 0.026 cats bait<sup>-1</sup> or  
307 37.55 baits cat-killed<sup>-1</sup>).

308 To estimate total costs, we first assumed that the density of traps applied on Dudley  
309 Peninsula (Dudley Peninsula = 37,500 ha) could be extrapolated to the much larger area of

310 the entire island (440,500 ha). Based on these densities, we calculated the total number of  
311 traps required for the entire island, and then tabulated the number of cats killed by this  
312 method for the incrementing proportional cull. We then combined this with baiting for the  
313 initial phase of culling.

314 If the total number of cats killed by these methods fell short of the proportional cull target  
315 in any given year and iteration, we applied three different scenarios where we varied the  
316 method used to achieve the proportional target beyond the initial roll-out of units and traps.  
317 The three different approaches to meet the shortfalls were: (i) *Felixers*<sup>TM</sup>, (ii) increasing the  
318 number of traps only, or (iii) meeting the shortfall entirely with follow-up shooting. In each  
319 shortfall scenario, we tabulated the total costs across the projection interval and expressed  
320 these as a function of the increments in proportional culling.

321 Of course, this approach assumes a simultaneous roll-out of all *Felixer*<sup>TM</sup> units and traps  
322 across the entire island, when a more efficient approach might instead be to purchase a  
323 smaller number of units/traps and deploy them in a spatially sequential roll-out (i.e., a  
324 moving ‘wave’ of units applied to specific regions of the island in sequence as localised  
325 eradication is achieved). We therefore also ran a modified scenario to reflect this type of  
326 spatial pattern of application by arbitrarily assuming a smaller number of units/traps across  
327 the entire landscape. Reducing the purchase cost per unit/trap by the same arbitrary value is  
328 therefore functionally equivalent to a spatially sequential roll-out of this smaller sample of  
329 units/traps. For this example scenario, we therefore reduced the purchase cost of both  
330 *Felixers*<sup>TM</sup> and traps by two-thirds unit<sup>-1</sup> (see Supporting Information, Appendix D, Fig. S4).

331

## 332 **Results**

### 333 *Untreated population*

334 An untreated (no-cull) ‘control’ population is expected to increase to a median of 1.9 times  
335 the founding population (i.e., to 3118 individuals when starting with 1629) by 2030 (95%  
336 confidence limits: 0.919–3.324 times) (Fig. 2a). The instantaneous rate of change ( $r$ ) from the  
337 deterministic matrix for the Kangaroo Island population is 0.222. The deterministic (mean)  
338 matrix gave a generation length of 3.207 years. The population is projected to approach  
339 carrying capacity (set arbitrarily at twice the current population size) and begin to plateau by  
340 2028 (Fig. 2a), at which time the population’s median  $r$  from the stochastic projections is  
341 0.009. By 2030, the population’s median  $r$  from the stochastic projection is 0.005.

342

343 *Trap-neuter-release*

344 The trap-neuter-release scenario would reduce the population to  $< 0.1$  (95% confidence  
345 limits: 0.036–0.221) of its original size by 2030 when the population's overall fertility is  
346 reduced by 26% (Fig. 3). A 55% reduction in fertility would drive the population to  $< 0.01$   
347 (0.021–0.003) of its original size by 2030.

348

349 *Culling*

350 Culling timeline 2020–2030: For the one-phase scenario, a minimum annual proportional cull  
351 of 0.35 would reduce the population to 0.10 of its initial size. A minimum annual cull of 0.5  
352 would reduce the population to 0.01 of its initial size (Fig. 2b). A two-phase cull with a  
353 minimum initial cull of 0.55 and a minimum maintenance cull of 0.3 would reduce the  
354 population to 0.10 of its initial size. To reduce the population to 0.01 of its initial size  
355 requires a minimum initial cull of 0.60 followed by a minimum maintenance cull of 0.5 (Fig.  
356 4) Stopping the program after the initial culling during the first two years (i.e., without any  
357 maintenance culling), the population would recover to its initial size in 15 years (range: 11–  
358 21 years; Fig. S4), whereas stopping the maintenance cull in the 9<sup>th</sup> year (i.e., a year before  
359 termination of the program) would result in population recovery to initial size in 42 years  
360 (range: 35–50 years) (Fig. S4). 'Leakage' from stray cats had little overall effect on the  
361 effectiveness of the total cull (Supporting Information, Appendix A, Fig. S1).

362

363 *Cost*

364 To reduce the entire Kangaroo Island population to a 0.10 of its original size ( $0.1N_1$ ) using a  
365 two-phase cull (minimum 0.55 initial, 0.3 maintenance), a minimum of AU\$19.56 million  
366 (AU\$16.87 million–AU\$20.69 million) (Fig. 5c), would be required if shooting was used to  
367 make up the yearly shortfall. In contrast, making up the shortfall with additional traps would  
368 increase the average costs by 88.75% to AU\$36.92 million (AU\$27.07 million–AU\$47.27  
369 million) for the same target (Fig. 5b). Finally, making up the shortfall with additional  
370 *Felixer*<sup>TM</sup> units would increase the average cost relative to the shooting-shortfall scenario by  
371 226.6% to AU\$63.89 million (AU\$47.56 million–AU\$70.17 million) (Fig. 5a). Changing the  
372 target population size to 0.01 (minimum 0.60 initial, 0.5 maintenance) of the initial ( $0.01N_1$ ),  
373 the total minimum costs would increase to AU\$24.38 (AU\$21.96–AU\$27.29 million) if the  
374 shortfall was made with shooting (24.64% more than the  $0.1N_1$  shooting-shortfall scenario),  
375 AU\$52.60 million (AU\$38.69 million–AU\$70.26 million) if the shortfall was made with  
376 traps (115.7% more than the  $0.01N_1$  shooting-shortfall scenario), or AU\$93.65 million

377 (AU\$78.52 million–AU\$1.11 billion) if the shortfall was made with *Felixers*<sup>TM</sup> (284.12%  
378 more than the 0.01 $N_1$  shooting-shortfall scenario) (Fig. 5).

379

380

## 381 **Discussion**

382 In each cull scenario we considered, a successful reduction of the feral cat population on  
383 Kangaroo Island to below 0.01 of its initial size by 2030 is achievable, but the minimum  
384 costs involved according to the different scenarios we ran could range from AU\$24.38  
385 million (AU\$55 ha<sup>-1</sup>, with shooting; Fig. 5c) to AU\$93.65 million (AU\$213 ha<sup>-1</sup>, with  
386 *Felixers*<sup>TM</sup>; Fig. 5a), depending on the method used and the inherent uncertainty in the  
387 parameters we estimated.

388 The realism of our modelled total cost estimates depends on the form of the (as-yet  
389 unmeasured) functional response, and the assumed per-unit efficacy of the eradication tools  
390 to meet the annual shortfall for the predetermined cull proportion. Reported costs for feral cat  
391 island eradications globally have a large range (AU\$6 ha<sup>-1</sup> – AU\$314 ha<sup>-1</sup>; adjusted to 2021  
392 AU\$; Campbell et al. 2011). Our lower cost estimate for culling only (AU\$55 ha<sup>-1</sup>) is 800%  
393 greater than the cost of complete eradication (including clean-up and monitoring for success)  
394 on Faure Island, Western Australia (AU\$6 ha<sup>-1</sup>) (Algar et al. 2010). However, Faure Island  
395 covers 5800 ha — and is therefore only 1.3% the size of Kangaroo Island (440000 ha). Dirk  
396 Hartog Island (62000 ha) is larger, at 14.1% the size of Kangaroo Island, and is currently the  
397 largest successful island eradication globally (Algar et al. 2020). Eradication there cost  
398 approximately AU\$90 ha<sup>-1</sup>, although that included construction of a barrier fence, clean-up,  
399 and monitoring for success (Algar et al. 2020). Our cost estimates for Kangaroo Island are  
400 377% cheaper than the cost to remove cats from Macquarie Island (AU\$258 ha<sup>-1</sup>), likely due  
401 to the latter's remoteness (Robinson & Copson 2014). Cost estimates are notably  
402 underreported in the literature; Campbell et al. (2011) found < 10% of successful island  
403 eradications reported costs. Further, reported costs are often whole costs, and provide little  
404 detail into money spent per stage (culling, clean-up, monitoring for success), making direct  
405 comparisons difficult.

406 Nonetheless, our outputs do suggest that high initial culls (> 0.55, 0.6) followed by  
407 moderate maintenance culls (0.3–0.5) would be sufficient to reduce the population to 0.01–  
408 0.10 of its original size (Fig. 4), and that shooting is the most cost-effective way to meet these  
409 targets (especially if other methods are rolled out simultaneously).

410 That shooting is cheaper than other methods is unsurprising given that no hardware other  
411 than rifles and ammunition is needed to be purchased outright, in contrast to the higher  
412 overheads associated with traps or *Felixer*<sup>TM</sup> units (Holmes et al. 2015; Hodgens 2019).  
413 However, it is not reasonable to assume that the *Felixer*<sup>TM</sup> will be used in the same  
414 widespread capacity as trapping and shooting. The *Felixer*<sup>TM</sup> is more likely to be used  
415 sporadically, or to target areas that are not appropriate for trapping or shooting (e.g.,  
416 roadsides, thick bushland, areas definitely known to be frequented by cats) (Moseby et al.  
417 2020). Therefore, our cost estimates using *Felixers* to make up the shortfall are for  
418 comparison rather than being recommendations *per se*.

419 Indeed, shooting requires many people working full time, whereas the other techniques are  
420 more passive (yet the latter also require set up, monitoring, maintenance, displacement, and  
421 removal by staff). However, approximately 500 person hours are required to equate to the  
422 current cost of a single *Felixer*<sup>TM</sup> unit (shooting ~ AU\$26 per person hour<sup>-1</sup> vs. AU\$13,000  
423 *Felixer*<sup>TM</sup> unit), although assuming a spatial roll-out of fewer units is functionally identical to  
424 a similar reduction in per-unit cost. Additionally, shooting is considered more humane due to  
425 the minimised contact with the animal and the instant death with a correctly executed  
426 headshot (Sharp & Saunders 2011), but access to private land and potential conflict with  
427 private landholders could complicate shooting because of the social licence needed for lethal  
428 control. Of course, complete eradication would necessarily entail additional costs as the final  
429 individuals were identified, hunted, and destroyed (Bester et al. 2002; Nogales et al. 2004),  
430 and a monitoring stage to ensure all individuals are removed (Campbell et al. 2011; Algar et  
431 al. 2020). These final stages are important because even a few individuals remaining could  
432 conceivably seed a recovery that could achieve initial population size in several decades  
433 (Supporting Information, Appendix D).

434 Our results also identify that fertility-reduction using trap-neuter-release methods are  
435 comparatively ineffective for reducing pest densities (Longcore et al. 2009). Our model  
436 output suggests that the population would need to have a realised fertility of 74% for the  
437 entirety of the study period (2020–2030) to reduce it below 0.1 of the initial population.  
438 Whether fertility reduction is feasible or cost-effective is beyond the scope of our study, but it  
439 does demonstrate that fertility-reduction is a much less efficient method to eradicate cats than  
440 culling. That trap-neuter-release is less efficient than lethal control is not a new finding.  
441 Matrix modelling for a free-roaming cat colony found population reduction to be more  
442 feasible with euthanasia than sterilisation (Andersen et al. 2004). Further, efforts to remove  
443 urban feral cats in Hawaii found the trap-neuter-release method less cost-effective than lethal



444 control, even when the former employed volunteers and the latter employed paid  
445 professionals (Lohr et al. 2013). Finally, Campbell et al. (2011) found no successful  
446 eradications on islands using the trap-neuter-release method. Additionally, sterilised  
447 individuals returned to the population could still continue to eat native fauna until they  
448 perished due to natural causes, so the risk cats pose to their prey is not diminished  
449 instantaneously, as it is with culling-based programs (Andersen et al. 2004).

450 We conclude that the most appropriate approach to reduce cat densities on Kangaroo  
451 Island is a two-stage method, with a high initial reduction of at least 0.55–0.7 and a  
452 maintenance cull of 0.3–0.65. Although a constant proportional annual cull can be effective,  
453 it is generally less efficient than a two-stage approach. This is because effort is spread equally  
454 among temporal windows in the constant proportional scenario, and therefore must ‘catch up’  
455 relative to a large, initial cull given that more surviving individuals are still breeding in the  
456 former. As culling reduces density and drives the population closer to extinction, it becomes  
457 progressively more difficult and expensive to cull remaining individuals (Nogales et al. 2004;  
458 Parkes et al. 2014). This is because most culling methods are passive and rely on a ‘non-  
459 negligible probability’ of the target animal encountering *Felixers*<sup>TM</sup>, baits, or traps (Moseby  
460 & Hill 2011; Fancourt et al. 2021). Although these techniques can be accompanied by visual,  
461 scent, or sound lures, the target animal still needs to be in range to be enticed by them. Thus,  
462 encounters at low densities become increasingly less likely (Veitch 2001; Campbell et al.  
463 2011), and rising per-capita food abundance as the predator’s population dwindles can make  
464 baits or food lures less attractive (Parkes et al. 2014). Aerial baiting is most effective in the  
465 initial years of eradication because they can be widely distributed, including in areas that are  
466 inaccessible with vehicles or on foot (Nogales et al. 2004; Parkes et al. 2014).

467 Cats in particular are intelligent predators and can learn to avoid traps and baits. Thus,  
468 while these methods are generally considered effective for density reduction, it is most  
469 effective in the early stages of eradication programs (Nogales et al. 2004). Therefore, a two-  
470 stage approach allows for the implementation of widespread control that is effective at high  
471 densities, followed by a more targeted approach through consecutive maintenance as the  
472 population continues to decline.

473 The merits of the stochastic framework we developed imply that the model is transferable  
474 to other regions and even other species. Altering locally measured demographic rates,  
475 population sizes, control effectiveness, and reduction targets are feasible with this approach.  
476 For example, the Australian federal government has prioritised Christmas Island (Australian  
477 territory), Bruny Island (Tasmania), and French Island (Victoria) for eradication (Bannister



478 2017). All three islands have permanent human residents (French Island: 110; Bruny Island:  
479 800; Christmas Island: 1840) and are considered large (greater than 1000 ha; Nogales et al.  
480 2004). Our model is also applicable to mainland density control and eradications; however, it  
481 is only recommended for eradication in exclusion zones because cats can rapidly recolonise  
482 areas that have undergone density reduction (Moseby & Hill 2011; Palmas et al. 2020). Our  
483 model also has applications for other species, including European red foxes (Edwards et al.  
484 2004) in Australia (particularly mainland exclusion zones), brush-tailed possums  
485 (*Trichosurus vulpecula*) and stoats (*Mustela erminea*) in New Zealand (Brown et al. 2015),  
486 and mainland application for species such as racoons (*Procyon lotor*) in central Europe  
487 (Beltrán-Beck et al. 2012).

488 For effective eradication to be achieved, culling programs must be based on empirical data  
489 and ideally, directed by models like ours. Our model should allow practitioners to make their  
490 culling programs more efficient, and to allocate the resources needed to achieve their targets  
491 efficiently and cost-effectively. As more site-specific data become available, we expect the  
492 model's predictions to become ever-more realistic to identify the most plausible and cheapest  
493 pathways to eradication.

494

### 495 **Perspective on the Kangaroo Island cat-eradication program**

496 Due to insufficient data for many model parameters and functions, we were obliged either to  
497 make (arguably defensible) assumptions or use data from other locations/studies (Budke and  
498 Slater 2009). Although we are confident that our results and scenarios are relevant, they will  
499 undoubtedly be improved by the refinement of locally measured parameters such as age-  
500 specific demographic rates, updated density estimates following the 2020 bushfires, cost data,  
501 efficiency relationships, strength of compensatory density feedback, and probability of  
502 leakage. A more detailed schedule for resource application including budget restrictions,  
503 timeline flexibility, currently available resources (to reduce initial costs via unit purchasing)  
504 and available staff would also assist in improving the realism of the predicted scenarios.

505 Further, the *Felixer*<sup>TM</sup> is still in the initial phases of production and is not yet produced on a  
506 large commercial scale. The *Felixer*<sup>TM</sup> has many merits in regards to feral cat control because  
507 of its hazard reduction for baiting non-target species (Read et al. 2019); thus, it is likely to be  
508 increasingly applied in future management projects, especially as costs per unit decline.

509

510 **Data availability:** The R code to create the model simulations is available at  
511 <https://github.com/KathrynVenning/FeralCatEradication>.

512

### 513 **Literature cited**

514 Algar D, Angus G, Brazell R, Gilbert C, Withnell G. 2010. Eradication of feral cats on Faure  
515 Island, Western Australia. *Journal of the Royal Society of Western Australia* **93**:133.

516 Algar D, Hamilton N, Onus M, Hilmer S, Comer S, Tiller C, Bell L, Pinder J, Adams E,  
517 Butler S. 2011. Field trial to compare baiting efficacy of Eradicat® and Curiosity®  
518 baits. Department of Environment and Conservation: Perth, WA, Australia.

519 Algar D, Johnston M, Tiller C, Onus M, Fletcher J, Desmond G, Hamilton N, Speldewinde P.  
520 2020. Feral cat eradication on Dirk Hartog Island, Western Australia. *Biological*  
521 *Invasions* **22**:1037-1054.

522 Andersen MC, Martin BJ, Roemer GW. 2004. Use of matrix population models to estimate  
523 the efficacy of euthanasia versus trap-neuter-return for management of free-roaming  
524 cats. *Journal of the American Veterinary Medical Association* **225**:1871-1876.

525 Bannister H. 2017. Island feral cat eradication workshop.

526 Beltrán-Beck B, García FJ, Gortázar C. 2012. Raccoons in Europe: disease hazards due to the  
527 establishment of an invasive species. *European Journal of Wildlife Research* **58**:5-15.

528 Berris K, Mulvaney J, Florence B, Hodgens P, Bolwell V. 2019. Felixer versus felis project;  
529 community engagement report., Kangaroo Island, SA.

530 Bester M, Bloomer J, Van Aarde R, Erasmus B, Van Rensburg P, Skinner J, Howell P,  
531 Naude T. 2002. A review of the successful eradication of feral cats from sub-Antarctic  
532 Marion Island, Southern Indian Ocean. *South African Journal of Wildlife Research*  
533 **32**:65-73.

534 Bloomer JP, Bester MN. 1991. Effects of hunting on population characteristics of feral cats  
535 on Marion Island. *South African Journal of Wildlife Research* **21**:97-102.

536 Bloomer JP, Bester MN. 1992. Control of feral cats on sub-Antarctic Marion Island, Indian  
537 Ocean. *Biological Conservation* **60**:211-219.

538 Bonnaud E, Medina FM, Vidal E, Nogales M, Tershy B, Zavaleta E, Donlan CJ, Keitt B, Le  
539 Corre M, Horwath SV. 2011. The diet of feral cats on islands: a review and a call for  
540 more studies. *Biological Invasions* **13**:581-603.

- 541 Brown K, Elliott G, Innes J, Kemp J. 2015. Ship rat, stoat and possum control on mainland  
542 New Zealand. An overview of techniques, successes and challenges. Wellington,  
543 Department of Conservation.
- 544 Budke CM, Slater MR. 2009. Utilization of matrix population models to assess a 3-year  
545 single treatment nonsurgical contraception program versus surgical sterilization in feral  
546 cat populations. *Journal of Applied Animal Welfare Science* **12**:277-292.
- 547 Bukowski J, Aiello S. 2011. Breeding and Reproduction of Cats, Available from  
548 [https://www.msdivetmanual.com/cat-owners/routine-care-and-breeding-of-](https://www.msdivetmanual.com/cat-owners/routine-care-and-breeding-of-cats/breeding-and-reproduction-of-cats?query=cat%20breeding)  
549 [cats/breeding-and-reproduction-of-cats?query=cat%20breeding](https://www.msdivetmanual.com/cat-owners/routine-care-and-breeding-of-cats/breeding-and-reproduction-of-cats?query=cat%20breeding).
- 550 Campbell K, Harper G, Algar D, Hanson C, Keitt B, Robinson S. 2011. Review of feral cat  
551 eradications on islands. *Island Invasives: Eradication and Management*:37-46.
- 552 Caswell H. 2001. Age-Classified Matrix Models. *Matrix Population Models, construction,*  
553 *analysis, and interpretation.* Sinauer Associates, Inc., Sunderland, Massachusetts.
- 554 Courchamp F, Sugihara G. 1999. Modeling the biological control of an alien predator to  
555 protect island species from extinction. *Ecological Applications* **9**:112-123.
- 556 Deak B, Ostendorf B, Taggart D, Peacock DE, Bardsley D. 2019. The significance of social  
557 perceptions in implementing successful feral cat management strategies: a global  
558 review. *Animals* **9**.
- 559 Denno RF, Lewis D. 2009. Predator-Prey Interactions. Pages 202-212 in Levin A S, editor.  
560 *The Princeton Guide to Ecology.* Princeton University Press, Princeton, New Jersey.
- 561 Denny EA, Dickman C. 2010. Review of cat ecology and management strategies in Australia.  
562 Invasive Animals Cooperative Research Centre, Canberra.
- 563 Department of Primary Industries and Regions. 2020. Using poison baits in South Australia,  
564 Available from  
565 [https://www.pir.sa.gov.au/biosecurity/weeds\\_and\\_pest\\_animals/animal\\_pests\\_in\\_south](https://www.pir.sa.gov.au/biosecurity/weeds_and_pest_animals/animal_pests_in_south_australia/using_1080_and_papp_baits_in_south_australia)  
566 [\\_australia/using\\_1080\\_and\\_papp\\_baits\\_in\\_south\\_australia](https://www.pir.sa.gov.au/biosecurity/weeds_and_pest_animals/animal_pests_in_south_australia/using_1080_and_papp_baits_in_south_australia).
- 567 DIISE. 2018. The Database of Island Invasive Species Eradications, developed by Island  
568 Conservation, Coastal Conservation Action Laboratory UCSC, IUCN SSC Invasive  
569 Species Specialist Group, University of Auckland and Landcare Research New  
570 Zealand. , Available from <http://diise.islandconservation.org>.
- 571 Doherty T, Dickman C, Johnson C, Legge S, Ritchie E, Woinarski J. 2016a. Impacts and  
572 management of feral cats *Felis catus* in Australia. *Mammal Review* **47**:83-97.

- 573 Doherty TS, Glen AS, Nimmo DG, Ritchie EG, Dickman CR. 2016b. Invasive predators and  
574 global biodiversity loss. *Proceedings of the National Academy of Sciences of the*  
575 *United States of America* **113**:11261-11265.
- 576 Driscoll CA, et al. 2007. The Near Eastern origin of cat domestication. *Science* **317**:519-523.
- 577 Edwards G, Pople A, Saalfeld K, Caley P. 2004. Introduced mammals in Australian  
578 rangelands: Future threats and the role of monitoring programmes in management  
579 strategies. *Austral Ecology* **29**:40-50.
- 580 Environment Dot. 2015. Threat abatement plan for predation by feral cats. Commonwealth of  
581 Australia **2015**:220-250.
- 582 Fancourt BA, Augusteyn J, Cremasco P, Nolan B, Richards S, Speed J, Wilson C, Gentle  
583 MN. 2021. Measuring, evaluating and improving the effectiveness of invasive predator  
584 control programs: Feral cat baiting as a case study. *Journal of Environmental*  
585 *Management* **280**:111691.
- 586 Fitzgerald B, Karl B, Veitch C. 1991. The diet of feral cats (*Felis catus*) on Raoul Island,  
587 Kermadec Group. *New Zealand Journal of Ecology*:123-129.
- 588 Gibson KL, Keizer K, Golding C. 2002. A trap, neuter, and release program for feral cats on  
589 Prince Edward Island. *The Canadian Veterinary Journal* **43**:695-692.
- 590 Higgins-Desbiolles F. 2011. Death by a thousand cuts: governance and environmental trade-  
591 offs in ecotourism development at Kangaroo Island, South Australia. *Journal of*  
592 *Sustainable Tourism* **19**:553-570.
- 593 Hodgens P. 2019. Felixer V's Felis Report. Kangaroo Island.
- 594 Hohnen R, Berris K, Hodgens P, Mulvaney J, Florence B, Murphy BP, Legge S, Dickman  
595 CR, Woinarski JCZ. 2020a. Feral cat density and population size across Kangaroo  
596 Island, South Australia
- 597 Hohnen R, Berris K, Hodgens P, Mulvaney J, Florence B, Murphy BP, Legge SM, Dickman  
598 CR, Woinarski JC. 2020b. Pre-eradication assessment of feral cat density and  
599 population size across Kangaroo Island, South Australia. *Wildlife Research* **47**:669-  
600 676.
- 601 Holmes N, Campbell K, Keitt B, Griffiths R, Beek J, Donlan C, Broome K. 2015. Reporting  
602 costs for invasive vertebrate eradications. *Biological Invasions* **17**:2913-2925.
- 603 Jemmett JE, Evans JM. 1977. A survey of sexual behaviour and reproduction of female cats.  
604 *Journal of Small Animal Practice* **18**:31-37.
- 605 Johnston M, Bould L, O'Donoghue M, Holdsworth M, Marmion P, Bilney R, Reside A,  
606 Caldwell D, Gaborov R, Gentles T. 2014. Field efficacy of the Curiosity® bait for

- 607 management of a feral cat population at Roxby Downs, South Australia. Arthur Rylah  
608 Institute for Environmental Research Technical Report Series.
- 609 Jones E, Coman B. 1982. Ecology of the feral cat, *Felis catus* (L.), in south-eastern Australia  
610 III. Home ranges and population ecology in semiarid north-west Victoria. *Wildlife*  
611 *Research* **9**:409-420.
- 612 Lohr CA, Cox LJ, Lepczyk CA. 2013. Costs and benefits of trap-neuter-release and  
613 euthanasia for removal of urban cats in Oahu, Hawaii. *Conservation Biology* **27**:64-73.
- 614 Longcore T, Rich C, Sullivan LM. 2009. Critical assessment of claims regarding  
615 management of feral cats by trap-neuter-return. *Conservation Biology* **23**:887-894.
- 616 Lowe S, Browne M, Boudjelas S, De Poorter M 2000. 100 of the world's worst invasive alien  
617 species: a selection from the global invasive species database. *Invasive Species*  
618 *Specialist Group* Auckland.
- 619 Masters P, Duka T, Berris S, Moss G. 2004. Koalas on Kangaroo Island: from introduction to  
620 pest status in less than a century. *Wildlife Research* **31**:267-272.
- 621 McCarthy RJ, Levine SH, Reed JM. 2013. Estimation of effectiveness of three methods of  
622 feral cat population control by use of a simulation model. *Journal of the American*  
623 *Veterinary Medical Association* **243**:502-511.
- 624 McMahon C, Brook B, Collier N, Bradshaw C. 2010. Spatially explicit spreadsheet  
625 modelling for optimising the efficiency of reducing invasive animal density. *Methods*  
626 *in Ecology and Evolution* **1**:53-68.
- 627 Medina FM, Bonnaud E, Vidal E, Tershy BR, Zavaleta ES, Donlan CJ, Keitt BS, Corre M,  
628 Horwath SV, Nogales M. 2011. A global review of the impacts of invasive cats on  
629 island endangered vertebrates. *Global Change Biology* **17**:3503-3510.
- 630 Miller PS, Boone JD, Briggs JR, Lawler DF, Levy JK, Nutter FB, Slater M, Zawistowski S.  
631 2014. Simulating free-roaming cat population management options in open  
632 demographic environments. *PLOS ONE* **9**:e113553.
- 633 Moseby KE, Hill BM. 2011. The use of poison baits to control feral cats and red foxes in arid  
634 South Australia I. Aerial baiting trials. *Wildlife Research* **38**:338-349.
- 635 Moseby KE, McGregor H, Read JL. 2020. Effectiveness of the Felixer grooming trap for the  
636 control of feral cats: a field trial in arid South Australia. *Wildlife Research* **47**:599-609.
- 637 Nogales M, Martín A, Tershy BR, Donlan CJ, Veitch D, Puerta N, Wood B, Alonso J. 2004.  
638 A review of feral cat eradication on islands. *Conservation Biology* **18**:310-319.
- 639 Nunney L. 1980. The influence of the type 3 (sigmoid) functional response upon the stability  
640 of predator-prey difference models. *Theoretical Population Biology* **18**:257-278.

- 641 Nutter FB. 2006. Evaluation of a trap-neuter-return management program for feral cat  
642 colonies: population dynamics, home ranges, and potentially zoonotic diseases.  
643 Comparative Biomedical Sciences. North Carolina State University, North Carolina.
- 644 Palmas P, Gouyet R, Oedin M, Millon A, Cassan J-J, Kowi J, Bonnaud E, Vidal E. 2020.  
645 Rapid recolonisation of feral cats following intensive culling in a semi-isolated context.  
646 NeoBiota **63**:177-200.
- 647 Parkes J, Fisher P, Robinson S, Aguirre-Muñoz A. 2014. Eradication of feral cats from large  
648 islands: an assessment of the effort required for success. New Zealand Journal of  
649 Ecology:307-314.
- 650 Povey RC. 1978. Reproduction in the pedigree female cat. A survey of breeders. The  
651 Canadian veterinary journal = La revue veterinaire canadienne **19**:207-213.
- 652 Read J, Bowen Z. 2001. Population dynamics, diet and aspects of the biology of feral cats  
653 and foxes in arid South Australia. Wildlife Research **28**:195-203.
- 654 Read JL, Bowden T, Hodgens P, Hess M, McGregor H, Moseby K. 2019. Target specificity  
655 of the felixer grooming “trap”. Wildlife Society Bulletin **43**:112-120.
- 656 Robertson SA. 2008. A review of feral cat control. Journal of Feline Medicine and Surgery  
657 **10**:366-375.
- 658 Robinson SA, Copson GR. 2014. Eradication of cats (*Felis catus*) from subantarctic  
659 Macquarie Island. Ecological Management & Restoration **15**:34-40.
- 660 Schmidt PM, Swannack TM, Lopez RR, Slater MR. 2009. Evaluation of euthanasia and trap-  
661 neuter-return (TNR) programs in managing free-roaming cat populations. Wildlife  
662 Research **36**:117-125.
- 663 Sharp T. 2018. Ground shooting of feral cats - Standard Operating Procedure. .
- 664 Sharp T, Quinn J. 2020. Baiting of feral cats with para-aminopropiophenone (PAPP) -  
665 Standard Operating Procedure.
- 666 Sharp T, Saunders G 2011. A model for assessing the relative humaneness of pest animal  
667 control methods. Department of Agriculture, Fisheries and Forestry Canberra,  
668 Australia.
- 669 Short J, Turner B. 2005. Control of feral cats for nature conservation. IV. Population  
670 dynamics and morphological attributes of feral cats at Shark Bay, Western Australia.  
671 Wildlife Research **32**:489-501.
- 672 Smith GC, S. HI, Robertson PA. 2005. A model of ruddy duck *Oxyura jamaicensis*  
673 eradication for the UK. Journal of Applied Ecology **42**:546-555.

- 674 Taggart PL, Fancourt BA, Bengsen AJ, Peacock DE, Hodgens P, Read JL, McAllister MM,  
675 Caraguel CG. 2019. Evidence of significantly higher island feral cat abundance  
676 compared with the adjacent mainland. *Wildlife Research* **46**:378-385.
- 677 Van Aarde R. 1983. Demographic parameters of the feral cat *Felis catus* population at  
678 Marion Island. *South African Journal of Wildlife Research* **13**:12-16.
- 679 Veitch C. 2001. The eradication of feral cats (*Felis catus*) from little Barrier Island, New  
680 Zealand. *New Zealand journal of zoology* **28**:1-12.
- 681 Wallace JL, Levy JK. 2006. Population characteristics of feral cats admitted to seven trap-  
682 neuter-return programs in the United States. *Journal of Feline Medicine and Surgery*  
683 **8**:279-284.
- 684 Willoughby N, Thompson D, Royal M, Miles M. 2018. South Australian land cover layers:  
685 an introduction and summary statistics, DEW technical report 2018/01. Technical  
686 Report. Adelaide.
- 687 Woinarski JCZ, Burbidge AA, Harrison PL. 2015. Ongoing unraveling of a continental  
688 fauna: Decline and extinction of Australian mammals since European settlement.  
689 *Proceedings of the National Academy of Sciences* **112**:4531-4540.
- 690  
691



**Table 1** – Mean parameter values and their standard deviations (SD) used in the stochastic model.

| <b>parameter</b>                 | <b>mean</b> | <b>SD</b> |
|----------------------------------|-------------|-----------|
| <i>fertility (daughters)</i>     |             |           |
| pre-breeding* juvenile ( $f_1$ ) | 0.000       | —         |
| sub-adult ( $f_2$ )              | 0.745       | 0.307     |
| adult ( $f_3$ – $f_7$ )          | 2.520       | 0.450     |
| <i>survival</i>                  |             |           |
| pre-breeding juvenile ( $s_1$ )  | 0.460       | 0.115     |
| sub-adult ( $s_2$ )              | 0.460       | 0.115     |
| adult ( $s_3$ – $s_6$ )          | 0.700       | 0.058     |
| senescent ( $s_7$ )              | 0.550       | 0.058     |

\*pre-breeding juvenile: < 10 months old; not sexually mature

## Figure Captions

**Figure 1** – Map of Kangaroo island relative to the Australian mainland. The shortest distance from the mainland (southern tip of Fleurieu Peninsula) to Kangaroo Island is approximately 14 km.

**Figure 2** – (a) Average proportion of the initial cat population ( $N_1$ ) on Kangaroo Island projected from 2020–2030 for the uncultured scenario. Black line indicates the median value from 10,000 iterations, along with 95% confidence intervals (grey-shaded area). (b) Minimum proportion of the Kangaroo Island feral cat population remaining after a constant proportional annual cull ranging from 0.2 to 0.9. Solid black line represents median minimum proportion of the initial population ( $N_1$ ) after 10,000 iterations with 95% confidence intervals indicated as grey-shaded area.

**Figure 3** – Estimated median minimum proportion of founding population remaining (founding population  $N_1$ ), with decreasing fertility (fertility reduced 50–99%). Solid black line represents median minimum proportion of the initial population ( $N_1$ ) remaining after fertility reduction scenarios, with 95% confidence intervals indicated as grey-shaded area.

**Figure 4** – Estimated median minimum proportion of the final population remaining (relative to start population  $N_1$ ) for combinations of initial proportional (i.e., *initial cull*: 0.5–0.9) and maintenance proportional (i.e., *maintenance cull*: 0.1–0.5) culling. Proportion of population remaining after culling scenarios represented by colour bar ranging from lowest (purple) to highest (yellow) remaining proportional population.

**Figure 5** – Estimated median total costs of feral cat eradication on Kangaroo Island for combinations of initial proportional (i.e., *initial cull*) and maintenance proportional (i.e., *maintenance cull*) culling, where the shortfall in the number of cats killed from *Felixer*<sup>TM</sup> units and traps is provided by (a) additional *Felixer*<sup>TM</sup> units, (b) traps, or (c) . Cost of eradication (in AU\$, adjusted for 2020) indicated by colour bar ranging from lowest (purple) to highest (yellow) costs. Contours and white values indicate cost in \$AU millions. Note different z-axis (contour) scales in a, b, and c.

**Figure 1**

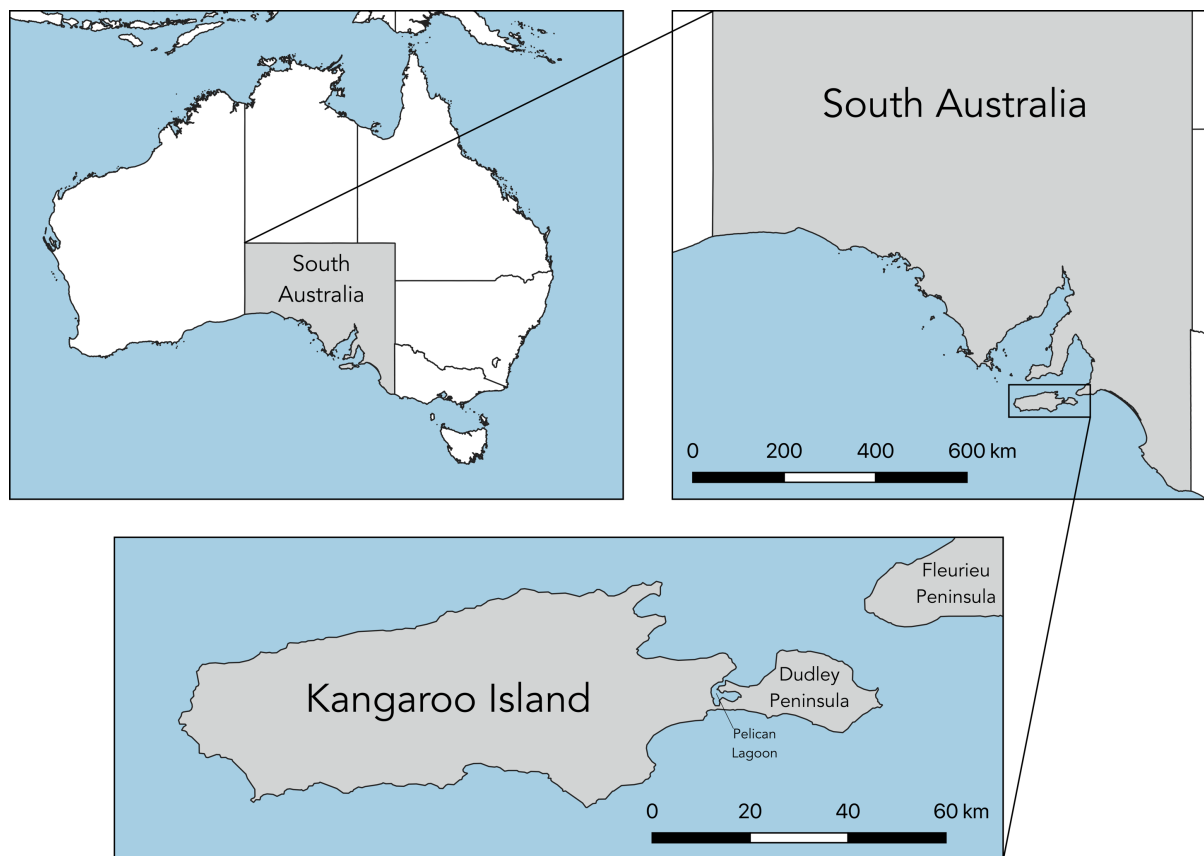

**Figure 2**

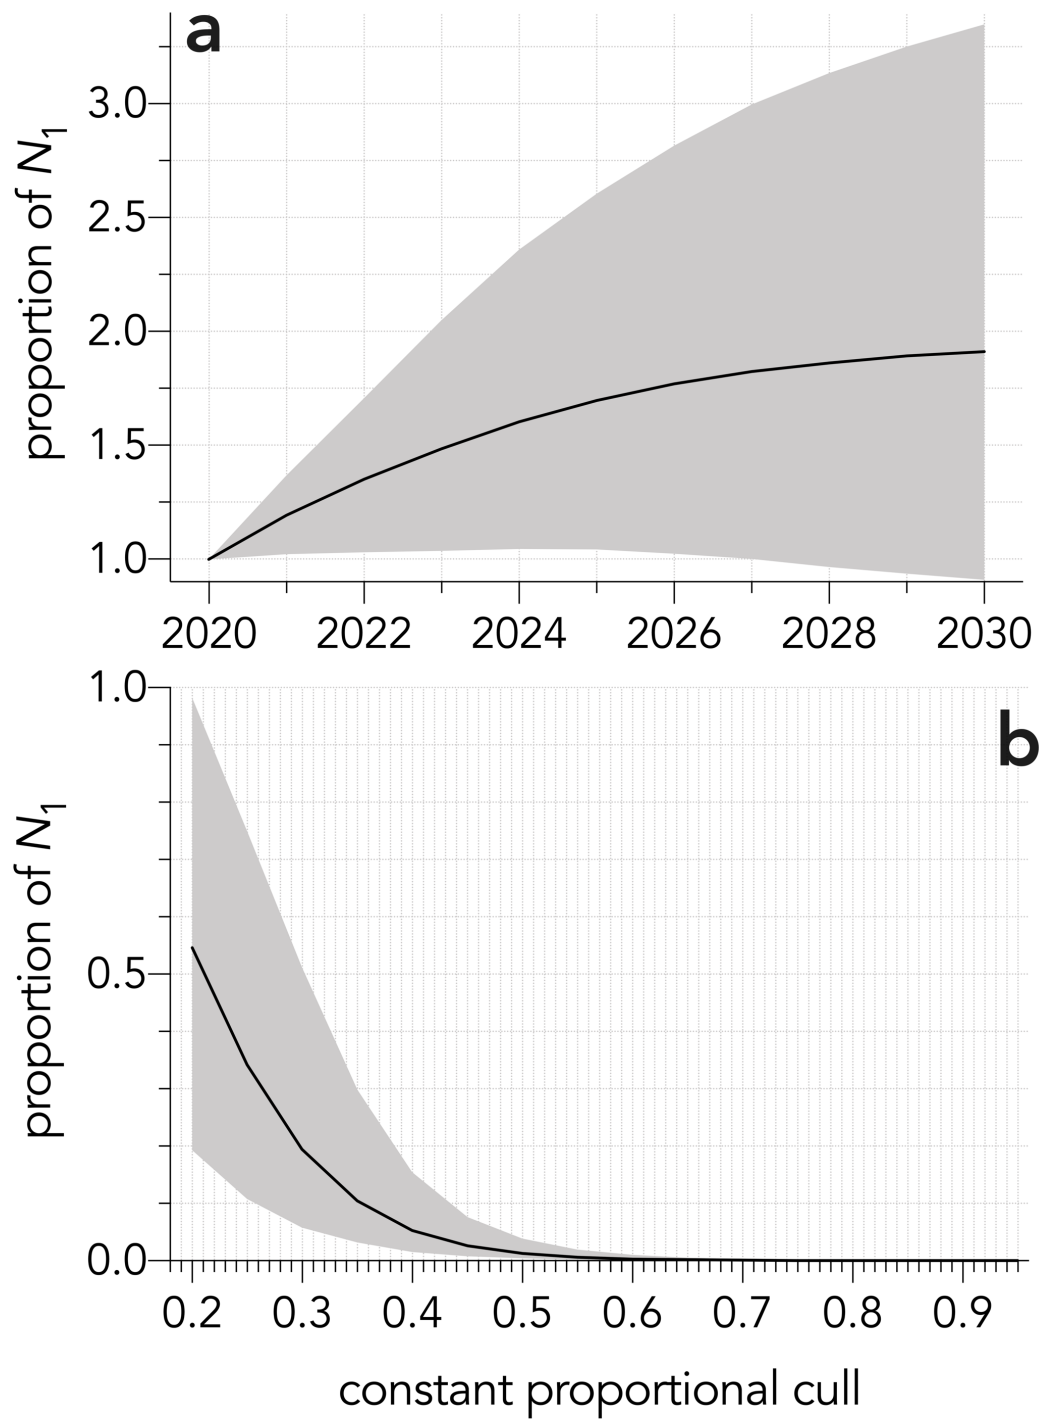

692 **Figure 3**

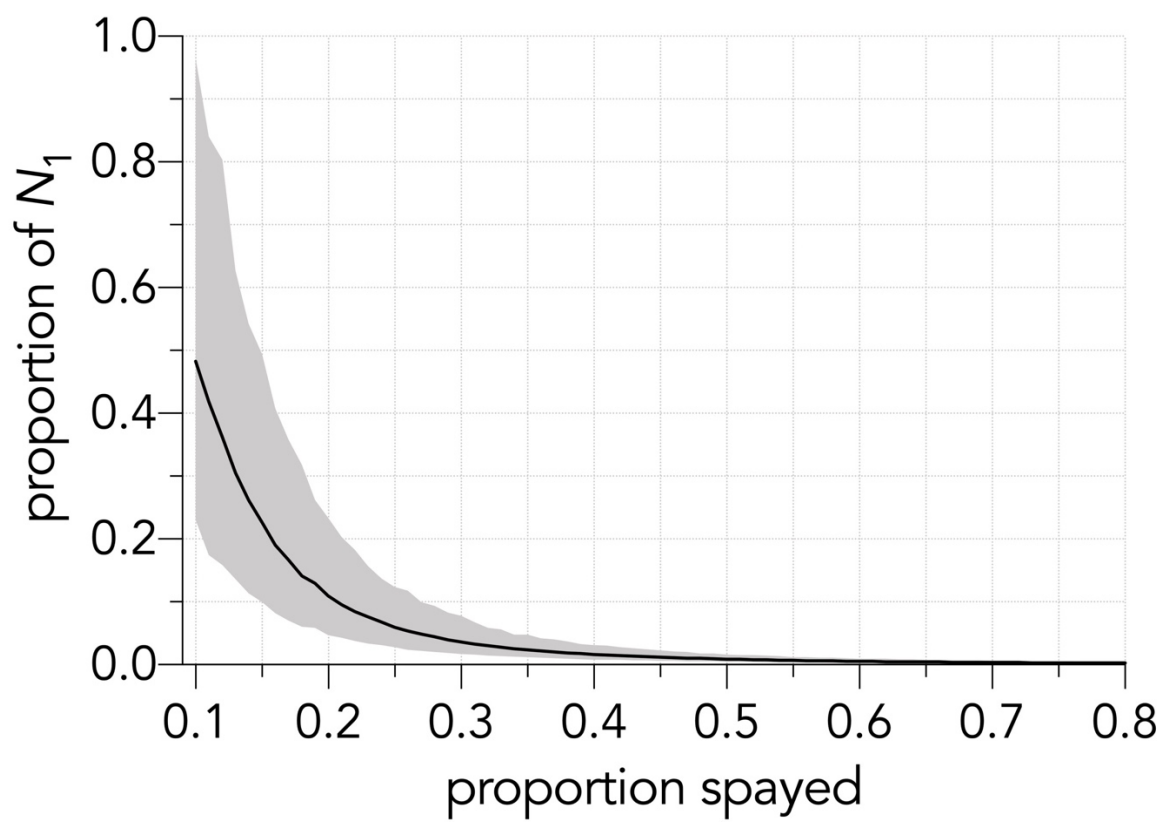

693

**Figure 4**

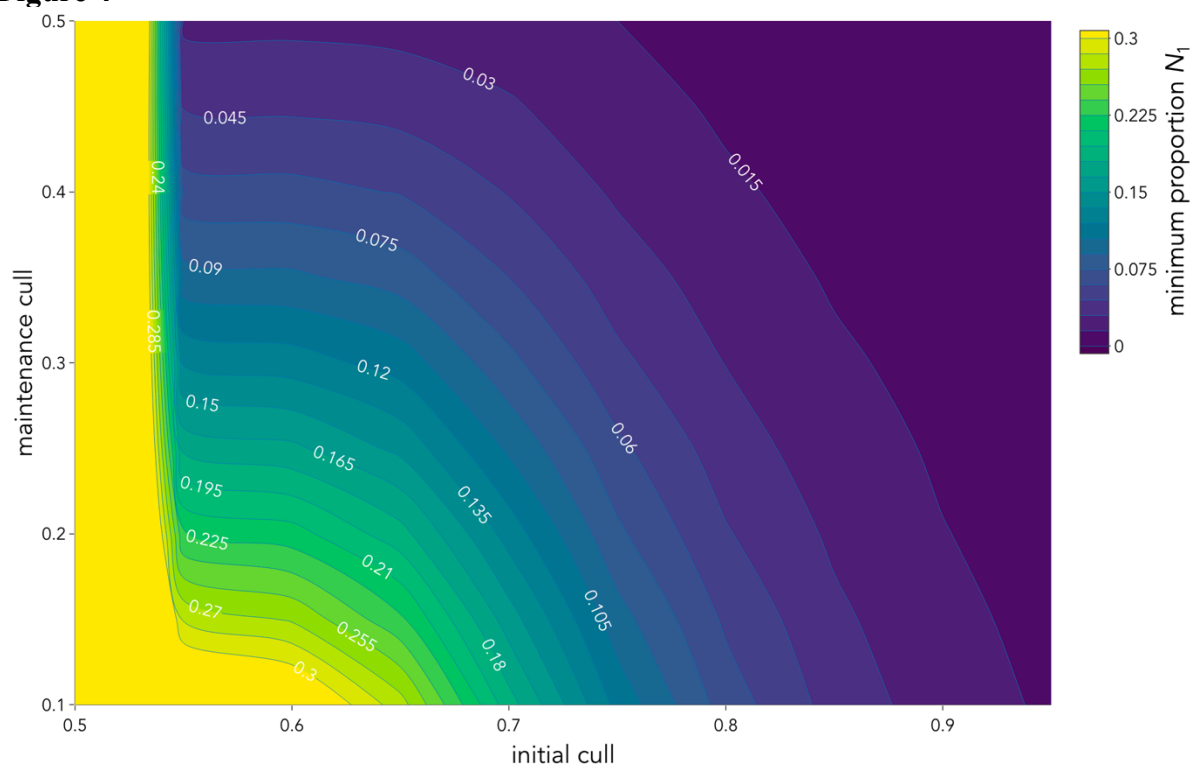

Figure 5

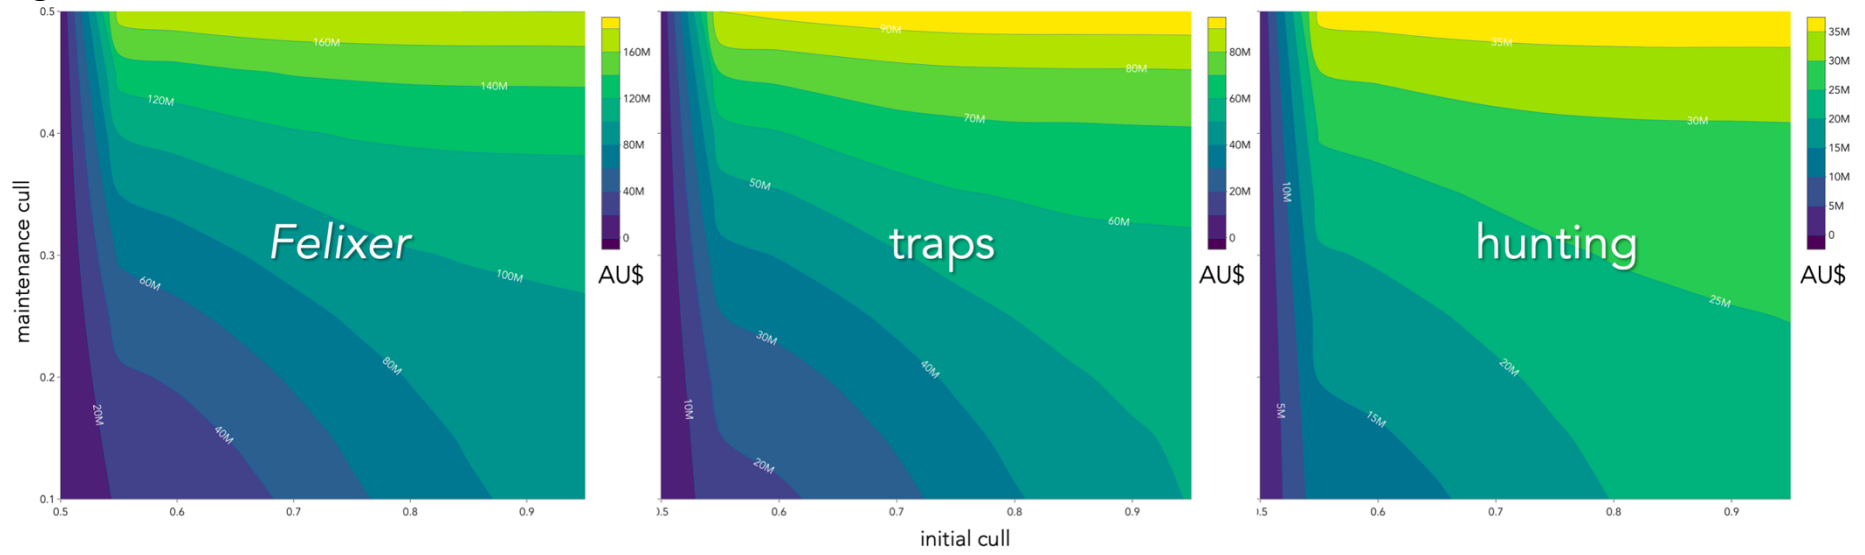

Source: https://www.biorxiv.org/content/10.1101/2020.06.12.149393v4.full.pdf
